# Supplementary material for: In Vivo, Non-Invasive Characterization of Human Bone by Hybrid Broadband (600-1200 nm) Diffuse Optical and Correlation Spectroscopies
Source: PubMed Central journal article supplement (PMC5172608; doi:10.1371/journal.pone.0168426), 2016-12-20
Supplement: pone.0168426.s001.pdf [file pone.0168426.s001.pdf]

## S1-Table

### Hemodynamics Parameters

C - Calcaneus

RD - Radius Distal

UD - Ulna Distal

T - Trochanter

RP - Radius Proximal

UP - Ulna Proximal

| Location | deoxy-hemoglobin ( $\mu\text{M}$ ) | oxy-hemoglobin ( $\mu\text{M}$ ) | oxygen saturation (%) | BFI ( $\text{cm}^2/\text{s}$ ) |
|----------|------------------------------------|----------------------------------|-----------------------|--------------------------------|
| C        | 3.6                                | 15.4                             | 81.1                  | 5.33E-09                       |
| C        | 4.6                                | 14.4                             | 75.8                  | 3.00E-09                       |
| C        | 7.7                                | 9.6                              | 55.7                  | 4.33E-09                       |
| C        | 4.5                                | 12.3                             | 73.1                  | 8.85E-09                       |
| C        | 6.3                                | 7.5                              | 54.2                  | 2.55E-08                       |
| C        | 3.3                                | 15.7                             | 82.7                  | 2.15E-08                       |
| C        | 5.8                                | 20.3                             | 77.9                  | 7.00E-09                       |
| C        | 2.7                                | 22.8                             | 89.3                  | 2.55E-08                       |
| C        | 9.0                                | 10.3                             | 53.5                  | 6.50E-09                       |
| C        | 4.0                                | 16.1                             | 80.3                  | 9.90E-09                       |
| C        | 4.1                                | 16.9                             | 80.6                  | 6.50E-09                       |
| C        | 1.9                                | 15.1                             | 89.0                  | 9.31E-09                       |
| C        | 2.4                                | 13.6                             | 85.2                  | 6.33E-09                       |
| C        | 0.9                                | 19.6                             | 95.7                  | 1.18E-08                       |
| C        | 2.8                                | 14.0                             | 83.5                  | 2.55E-08                       |
| C        | 3.7                                | 14.1                             | 79.3                  | 7.00E-09                       |
| T        | 2.1                                | 5.5                              | 72.7                  | 5.96E-09                       |
| T        | 3.5                                | 2.4                              | 41.4                  | 2.95E-09                       |
| T        | 1.8                                | 6.4                              | 77.9                  | 7.16E-09                       |
| T        | 4.8                                | 3.3                              | 40.7                  | 2.08E-09                       |
| T        | 2.5                                | 5.7                              | 69.2                  | 7.55E-09                       |
| T        | 2.4                                | 5.1                              | 68.2                  | 1.02E-08                       |
| T        | 2.7                                | 3.7                              | 58.0                  | 5.67E-09                       |
| T        | 1.9                                | 9.4                              | 83.2                  | 3.69E-09                       |
| T        | 3.6                                | 9.7                              | 72.8                  | 7.07E-09                       |
| T        | 3.1                                | 6.4                              | 67.6                  | 1.45E-08                       |
| T        | 3.1                                | 5.4                              | 63.1                  | 2.37E-09                       |
| T        | 2.3                                | 5.4                              | 70.5                  | 1.05E-08                       |
| T        | 1.6                                | 7.2                              | 82.0                  | 5.77E-09                       |
| T        | 3.0                                | 6.8                              | 69.4                  | 4.65E-09                       |
| T        | 5.2                                | 31.9                             | 86.0                  | 1.18E-08                       |
| T        | 4.0                                | 15.7                             | 79.5                  | 5.90E-09                       |
| T        | 2.8                                | 7.7                              | 73.7                  | 2.71E-09                       |
| RD       | 3.2                                | 19.6                             | 85.8                  | 3.73E-09                       |
| RD       | 6.5                                | 9.9                              | 60.1                  | 1.32E-08                       |
| RD       | 15.1                               | 11.8                             | 44.0                  | 6.84E-09                       |
| RD       | 7.5                                | 30.6                             | 80.4                  | 7.88E-09                       |
| RD       | 2.7                                | 11.3                             | 80.6                  | 5.25E-09                       |
| RD       | 4.3                                | 15.9                             | 78.9                  | 3.79E-09                       |

|    |      |      |      |          |
|----|------|------|------|----------|
| RD | 7.9  | 27.1 | 77.5 | 7.04E-09 |
| RD | 1.3  | 17.1 | 93.0 | 9.31E-09 |
| RD | 6.2  | 27.2 | 81.5 | 8.44E-09 |
| RD | 4.5  | 20.3 | 81.8 | 2.47E-08 |
| RD | 6.9  | 16.4 | 70.4 | 2.44E-09 |
| RD | 7.3  | 15.5 | 67.9 | 4.85E-09 |
| RD | 1.2  | 14.3 | 92.2 | 4.29E-09 |
| RD | 1.6  | 13.9 | 89.8 | 5.33E-09 |
| RD | 3.5  | 27.6 | 88.8 | 7.43E-09 |
| RD | 13.6 | 22.8 | 62.7 | 4.91E-09 |
| RD | 4.2  | 15.1 | 78.3 | 3.04E-09 |
| UD | 6.3  | 18.0 | 74.1 | 3.82E-09 |
| UD | 6.0  | 18.6 | 75.6 | 6.31E-10 |
| UD | 22.7 | 3.9  | 14.6 | 1.01E-09 |
| UD | 1.9  | 21.3 | 92.0 | 1.24E-09 |
| UD | 3.6  | 17.0 | 82.4 | 1.01E-08 |
| UD | 8.3  | 12.2 | 59.6 | 5.82E-09 |
| UD | 8.9  | 24.9 | 73.6 | 1.88E-09 |
| UD | 5.2  | 28.5 | 84.5 | 5.71E-09 |
| UD | 19.4 | 31.4 | 61.8 | 1.89E-09 |
| UD | 6.6  | 19.6 | 74.9 | 2.92E-09 |
| UD | 11.9 | 27.1 | 69.4 | 2.40E-09 |
| UD | 4.6  | 21.4 | 82.4 | 1.78E-09 |
| UD | 2.6  | 15.1 | 85.2 | 1.82E-09 |
| UD | 1.7  | 14.9 | 89.6 | 2.79E-09 |
| UD | 18.5 | 31.8 | 63.3 | 3.18E-09 |
| UD | 3.4  | 16.6 | 83.1 | 7.03E-09 |
| UD | 5.6  | 14.3 | 71.8 | 3.38E-09 |
| RP | 2.0  | 15.9 | 88.9 | 1.33E-08 |
| RP | 9.4  | 26.3 | 73.6 | 1.55E-09 |
| RP | 9.3  | 18.7 | 66.7 | 1.32E-08 |
| RP | 7.4  | 21.6 | 74.4 | 1.30E-09 |
| RP | 3.3  | 15.9 | 82.8 | 2.36E-09 |
| RP | 9.7  | 16.8 | 63.5 | 1.91E-08 |
| RP | 2.1  | 25.6 | 92.6 | 1.37E-08 |
| RP | 20.0 | 58.9 | 74.6 | 3.35E-09 |
| RP | 5.2  | 33.0 | 86.3 | 8.94E-09 |
| RP | 16.6 | 28.9 | 63.6 | 7.06E-09 |
| RP | 4.8  | 26.1 | 84.5 | 6.61E-09 |
| RP | 8.2  | 26.2 | 76.1 | 7.50E-09 |
| RP | 8.5  | 35.8 | 80.7 | 4.13E-09 |
| RP | 1.2  | 21.8 | 94.9 | 5.05E-09 |
| RP | 6.5  | 25.1 | 79.6 | 1.55E-08 |
| RP | 4.8  | 25.9 | 84.4 | 3.57E-09 |
| RP | 4.1  | 19.4 | 82.4 | 1.34E-09 |
| UP | 1.2  | 23.9 | 95.4 | 2.38E-09 |
| UP | 39.3 | 31.3 | 44.3 | 3.79E-09 |

|    |      |      |      |          |
|----|------|------|------|----------|
| UP | 38.7 | 59.6 | 60.6 | 3.60E-09 |
| UP | 17.1 | 3.3  | 16.1 | 9.87E-09 |
| UP | 9.4  | 19.4 | 67.4 | 1.06E-08 |
| UP | 27.4 | 19.0 | 41.0 | 7.83E-09 |
| UP | 2.9  | 5.8  | 66.7 | 1.21E-08 |
| UP | 26.2 | 32.5 | 55.4 | 6.84E-09 |
| UP | 36.4 | 46.8 | 56.3 | 1.11E-08 |
| UP | 38.4 | 47.3 | 55.2 | 1.44E-08 |
| UP | 31.5 | 58.8 | 65.1 | 3.07E-09 |
| UP | 20.4 | 40.4 | 66.5 | 6.23E-09 |
| UP | 27.0 | 37.8 | 58.3 | 9.41E-09 |
| UP | 10.5 | 27.7 | 72.4 | 5.18E-09 |
| UP | 70.5 | 32.0 | 31.2 | 4.91E-09 |
| UP | 9.6  | 36.9 | 79.3 | 5.49E-09 |
| UP | 7.3  | 21.7 | 74.9 | 1.80E-09 |
