# Supplementary material for: In Vivo, Non-Invasive Characterization of Human Bone by Hybrid Broadband (600-1200 nm) Diffuse Optical and Correlation Spectroscopies
Source: PubMed Central journal article supplement (PMC5172608; doi:10.1371/journal.pone.0168426), 2016-12-20
Supplement: pone.0168426.s002.pdf [file pone.0168426.s002.pdf]

## S2-Table

### Tissue Constituents

C - Calcaneus

T - Trochanter

RD - Radius Distal

RP - Radius Proximal

UD - Ulna Distal

UP - Ulna Proximal

| Location | Lipid (mg/cm <sup>3</sup> ) | Water (mg/cm <sup>3</sup> ) | Collagen (mg/cm <sup>3</sup> ) |
|----------|-----------------------------|-----------------------------|--------------------------------|
| C        | 704.6                       | 195.7                       | 57.1                           |
| C        | 692.5                       | 177.8                       | 84.2                           |
| C        | 510.6                       | 174.9                       | 130.6                          |
| C        | 770.0                       | 179.2                       | 53.9                           |
| C        | 622.0                       | 157.4                       | 60.2                           |
| C        | 624.8                       | 202.5                       | 56.2                           |
| C        | 601.1                       | 178.0                       | 74.4                           |
| C        | 663.5                       | 208.4                       | 15.5                           |
| C        | 592.2                       | 160.0                       | 90.3                           |
| C        | 686.0                       | 182.5                       | 60.8                           |
| C        | 593.8                       | 208.8                       | 74.9                           |
| C        | 731.7                       | 167.9                       | 50.7                           |
| C        | 597.0                       | 262.1                       | 87.1                           |
| C        | 657.8                       | 188.0                       | 67.7                           |
| C        | 681.1                       | 148.7                       | 83.5                           |
| C        | 650.3                       | 212.7                       | 63.5                           |
| RD       | 606.0                       | 335.2                       | 118.7                          |
| RD       | 752.4                       | 335.5                       | 149.2                          |
| RD       | 216.8                       | 374.4                       | 294.2                          |
| RD       | 785.1                       | 380.6                       | 37.1                           |
| RD       | 800.4                       | 209.2                       | 49.9                           |
| RD       | 726.5                       | 296.8                       | 103.0                          |
| RD       | 842.8                       | 318.8                       | 93.6                           |
| RD       | 852.1                       | 193.4                       | 35.7                           |
| RD       | 814.9                       | 399.1                       | 194.8                          |
| RD       | 651.0                       | 364.1                       | 115.4                          |
| RD       | 947.4                       | 319.7                       | 80.1                           |
| RD       | 1027.4                      | 327.1                       | 51.5                           |
| RD       | 682.4                       | 371.7                       | 137.7                          |
| RD       | 556.1                       | 291.4                       | 144.3                          |
| RD       | 965.8                       | 367.4                       | 94.5                           |
| RD       | 687.0                       | 411.2                       | 111.4                          |
| RD       | 814.7                       | 304.5                       | 82.5                           |
| RP       | 662.1                       | 323.9                       | 123.2                          |
| RP       | 460.3                       | 567.7                       | 210.4                          |
| RP       | 415.5                       | 442.3                       | 169.0                          |
| RP       | 499.6                       | 329.6                       | 131.8                          |
| RP       | 749.2                       | 321.1                       | 36.8                           |
| RP       | 822.4                       | 313.2                       | 93.4                           |
| RP       | 615.0                       | 335.1                       | 130.8                          |

|    |        |       |       |
|----|--------|-------|-------|
| RP | 191.6  | 410.5 | 0.0   |
| RP | 738.7  | 458.8 | 123.2 |
| RP | 642.5  | 474.6 | 83.0  |
| RP | 1257.0 | 332.6 | 52.0  |
| RP | 728.1  | 401.6 | 130.6 |
| RP | 634.2  | 405.4 | 129.2 |
| RP | 561.1  | 352.7 | 197.0 |
| RP | 858.2  | 406.6 | 59.1  |
| RP | 518.6  | 345.1 | 111.9 |
| RP | 581.9  | 297.8 | 136.5 |
| T  | 884.6  | 101.3 | 16.1  |
| T  | 809.6  | 134.1 | 35.3  |
| T  | 894.5  | 171.9 | 21.7  |
| T  | 992.1  | 110.8 | 0.0   |
| T  | 964.8  | 83.9  | 11.2  |
| T  | 1005.1 | 66.4  | 13.9  |
| T  | 852.7  | 130.2 | 33.9  |
| T  | 955.2  | 114.4 | 0.0   |
| T  | 655.0  | 297.1 | 74.6  |
| T  | 853.5  | 131.6 | 21.2  |
| T  | 664.0  | 118.3 | 52.3  |
| T  | 825.3  | 143.3 | 17.6  |
| T  | 1009.5 | 103.9 | 13.7  |
| T  | 879.6  | 141.2 | 54.1  |
| T  | 1028.2 | 249.9 | 0.0   |
| T  | 1009.4 | 249.1 | 49.2  |
| T  | 953.6  | 119.7 | 0.0   |
| UD | 798.9  | 316.7 | 43.8  |
| UD | 871.1  | 232.1 | 27.5  |
| UD | 111.3  | 312.4 | 243.1 |
| UD | 1007.7 | 154.8 | 0.0   |
| UD | 621.2  | 250.4 | 107.9 |
| UD | 870.6  | 276.2 | 68.8  |
| UD | 722.2  | 235.6 | 30.4  |
| UD | 928.6  | 317.3 | 89.6  |
| UD | 779.5  | 390.3 | 0.0   |
| UD | 1081.0 | 297.4 | 4.6   |
| UD | 994.6  | 235.1 | 0.0   |
| UD | 822.6  | 211.4 | 44.9  |
| UD | 750.6  | 249.7 | 91.0  |
| UD | 438.9  | 250.1 | 121.0 |
| UD | 977.2  | 466.1 | 6.2   |
| UD | 614.1  | 188.9 | 58.1  |
| UD | 743.5  | 246.4 | 70.7  |
| UP | 895.0  | 458.6 | 128.6 |
| UP | 351.7  | 609.8 | 151.8 |
| UP | 361.1  | 869.9 | 0.2   |

|    |        |       |       |
|----|--------|-------|-------|
| UP | 718.4  | 248.2 | 225.2 |
| UP | 809.1  | 447.9 | 0.0   |
| UP | 607.0  | 534.8 | 123.5 |
| UP | 1006.1 | 201.8 | 54.5  |
| UP | 216.0  | 869.9 | 283.5 |
| UP | 473.0  | 735.9 | 260.5 |
| UP | 808.0  | 750.2 | 47.9  |
| UP | 1315.1 | 288.3 | 0.0   |
| UP | 1043.5 | 398.0 | 0.0   |
| UP | 768.1  | 506.7 | 50.8  |
| UP | 178.3  | 506.6 | 241.2 |
| UP | 853.8  | 650.1 | 34.0  |
| UP | 726.6  | 496.9 | 42.9  |
| UP | 826.9  | 386.2 | 67.1  |
