# Supplementary material for: In Vivo, Non-Invasive Characterization of Human Bone by Hybrid Broadband (600-1200 nm) Diffuse Optical and Correlation Spectroscopies
Source: PubMed Central journal article supplement (PMC5172608; doi:10.1371/journal.pone.0168426), 2016-12-20
Supplement: pone.0168426.s003.pdf [file pone.0168426.s003.pdf]

### S3-Table

#### Scattering Parameters

C - Calcaneus

T - Trochanter

RD - Radius Distal

RP - Radius Proximal

UD - Ulna Distal

UP - Ulna Proximal

| Location | scattering amplitude - a (cm <sup>-1</sup> ) | scattering power - b |
|----------|----------------------------------------------|----------------------|
| C        | 13.8                                         | 0.7                  |
| C        | 10.8                                         | 0.7                  |
| C        | 11.9                                         | 0.6                  |
| C        | 13.2                                         | 0.6                  |
| C        | 12.5                                         | 0.7                  |
| C        | 13.8                                         | 0.7                  |
| C        | 12.0                                         | 0.7                  |
| C        | 13.2                                         | 0.7                  |
| C        | 11.4                                         | 0.6                  |
| C        | 14.3                                         | 0.9                  |
| C        | 13.8                                         | 0.8                  |
| C        | 13.4                                         | 0.8                  |
| C        | 12.5                                         | 0.7                  |
| C        | 13.3                                         | 0.8                  |
| C        | 12.9                                         | 0.9                  |
| C        | 12.5                                         | 0.6                  |
| RD       | 6.3                                          | 0.8                  |
| RD       | 7.5                                          | 0.8                  |
| RD       | 7.2                                          | 1.2                  |
| RD       | 10.7                                         | 0.2                  |
| RD       | 4.7                                          | 0.6                  |
| RD       | 5.9                                          | 0.7                  |
| RD       | 8.1                                          | 0.7                  |
| RD       | 8.9                                          | 0.6                  |
| RD       | 6.8                                          | 0.8                  |
| RD       | 3.2                                          | 0.3                  |
| RD       | 10.0                                         | 0.6                  |
| RD       | 6.6                                          | 0.8                  |
| RD       | 5.6                                          | 0.4                  |
| RD       | 7.0                                          | 0.5                  |
| RD       | 4.3                                          | 0.5                  |
| RD       | 6.2                                          | 0.4                  |
| RD       | 7.3                                          | 0.7                  |
| RP       | 6.8                                          | 0.1                  |
| RP       | 3.1                                          | 0.3                  |
| RP       | 6.3                                          | 0.8                  |
| RP       | 6.5                                          | 1.1                  |
| RP       | 4.6                                          | 0.0                  |
| RP       | 8.0                                          | 0.3                  |
| RP       | 6.5                                          | 0.6                  |

|    |      |     |
|----|------|-----|
| RP | 10.0 | 0.9 |
| RP | 8.0  | 0.5 |
| RP | 4.9  | 0.5 |
| RP | 10.0 | 0.4 |
| RP | 7.2  | 0.9 |
| RP | 8.0  | 0.4 |
| RP | 7.5  | 0.3 |
| RP | 5.1  | 0.1 |
| RP | 8.4  | 0.8 |
| RP | 8.8  | 0.7 |
| T  | 9.9  | 0.6 |
| T  | 10.6 | 0.8 |
| T  | 12.1 | 0.7 |
| T  | 9.5  | 0.4 |
| T  | 7.6  | 0.5 |
| T  | 7.8  | 0.6 |
| T  | 10.9 | 0.7 |
| T  | 10.4 | 0.6 |
| T  | 13.6 | 0.8 |
| T  | 11.1 | 0.7 |
| T  | 10.9 | 0.7 |
| T  | 10.9 | 0.8 |
| T  | 10.6 | 0.7 |
| T  | 8.3  | 0.6 |
| T  | 12.2 | 0.5 |
| T  | 11.2 | 0.6 |
| T  | 9.6  | 0.7 |
| UD | 2.8  | 0.2 |
| UD | 9.4  | 1.0 |
| UD | 4.2  | 1.5 |
| UD | 8.1  | 0.0 |
| UD | 9.3  | 0.6 |
| UD | 3.6  | 0.5 |
| UD | 4.2  | 1.0 |
| UD | 8.4  | 0.3 |
| UD | 5.8  | 0.6 |
| UD | 3.1  | 0.5 |
| UD | 6.2  | 1.2 |
| UD | 7.7  | 0.8 |
| UD | 6.9  | 0.4 |
| UD | 4.9  | 0.9 |
| UD | 3.9  | 1.0 |
| UD | 7.0  | 0.9 |
| UD | 11.3 | 0.7 |
| UP | 10.3 | 0.4 |
| UP | 6.9  | 0.9 |
| UP | 7.4  | 0.4 |

|    |     |     |
|----|-----|-----|
| UP | 6.0 | 1.2 |
| UP | 3.2 | 0.0 |
| UP | 6.7 | 0.7 |
| UP | 7.5 | 0.0 |
| UP | 5.9 | 0.4 |
| UP | 9.3 | 0.7 |
| UP | 6.1 | 1.0 |
| UP | 8.6 | 1.1 |
| UP | 6.6 | 0.3 |
| UP | 7.1 | 0.8 |
| UP | 6.7 | 0.5 |
| UP | 8.9 | 1.4 |
| UP | 4.8 | 0.7 |
| UP | 8.4 | 0.8 |
